# Supplementary material for: Identification of BRAF V600E mutation in odontogenic tumors by high-performance MALDI-TOF analysis
Source: PubMed Central journal article supplement (PMC9038922; doi:10.1038/s41368-022-00170-8), 2022-04-25
Supplement: 41368_2022_170_MOESM2_ESM.pdf [file 41368_2022_170_MOESM2_ESM.pdf]

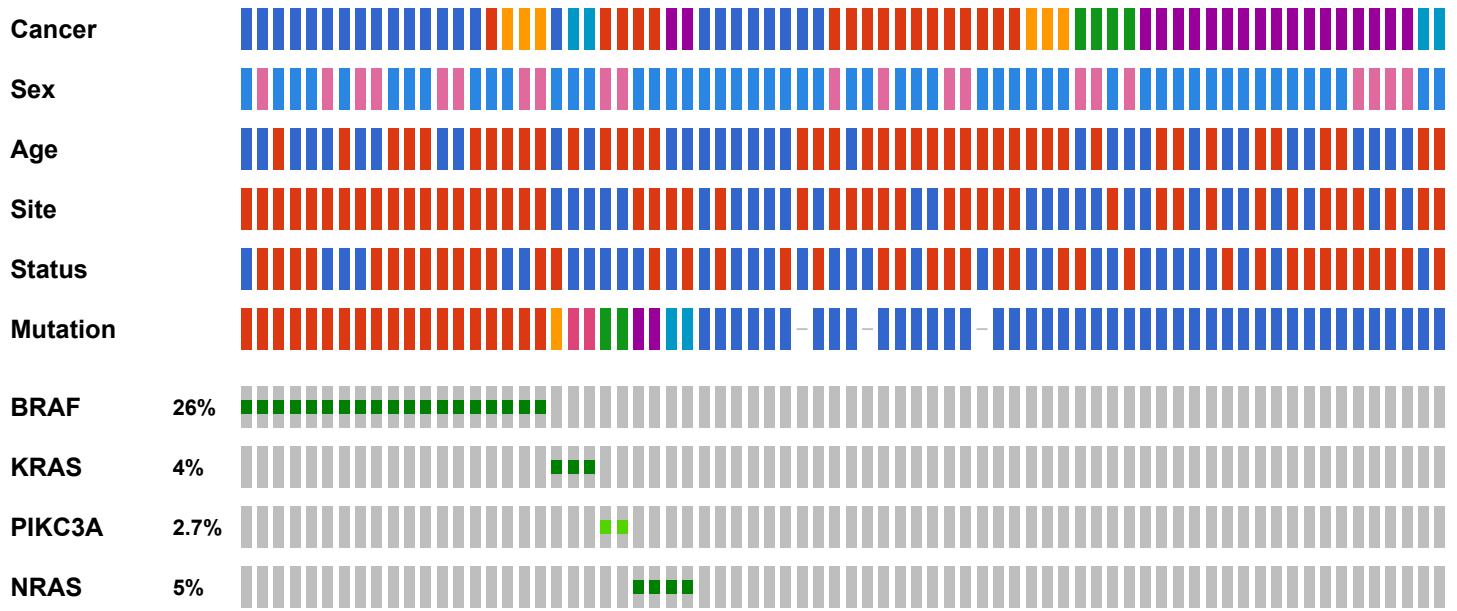

**Genetic Alteration**

- Missense Mutation (putative driver)
- Missense Mutation (unknown significance)
- No alterations

**Cancer**

- AC
- AEP
- AU
- CA
- CEOT
- OKC

**Sex**

- F
- M

**Age**

- <45
- ≥45

**Site**

- MAND
- MAX

**Status**

- P
- R

**Mutation**

- A>G
- A>T
- C>T
- G>A
- G>C
- T>A
- WT
- No data
