# Supplementary material for: Identification of BRAF V600E mutation in odontogenic tumors by high-performance MALDI-TOF analysis
Source: PubMed Central journal article supplement (PMC9038922; doi:10.1038/s41368-022-00170-8), 2022-04-25
Supplement: 41368_2022_170_MOESM3_ESM.pdf [file 41368_2022_170_MOESM3_ESM.pdf]

| N* | Diagnosis | Gender | Age | Site | Status | IHC | Sanger     | Sequenom         |
|----|-----------|--------|-----|------|--------|-----|------------|------------------|
| 1  | AU        | M      | 26  | Max  | Rec    | Neg | WT         | WT               |
| 2  | AU        | M      | 31  | Mand | Rec    | Pos | BRAF V600E | BRAF V600E       |
| 3  | AU        | F      | 38  | Mand | Prim   | Pos | BRAF V600E | BRAF V600E       |
| 4  | AU        | M      | 32  | Mand | Prim   | Pos | WT         | WT               |
| 5  | AU        | M      | 62  | Mand | Prim   | Pos | BRAF V600E | BRAF V600E       |
| 6  | AU        | M      | 29  | Mand | Prim   | Pos | BRAF V600E | BRAF V600E       |
| 7  | AU        | M      | 29  | Mand | Prim   | Pos | BRAF V600E | BRAF V600E       |
| 8  | AU        | M      | 22  | Max  | Rec    | Neg | WT         | WT               |
| 9  | AU        | M      | 21  | Max  | Rec    | Neg | WT         | WT               |
| 10 | AU        | F      | 31  | Mand | Rec    | Pos | BRAF V600E | BRAF V600E       |
| 11 | AU        | M      | 28  | Max  | Prim   | Neg | WT         | KRAS G12R        |
| 12 | AU        | M      | 22  | Max  | Rec    | Neg | WT         | WT               |
| 13 | AU        | M      | 66  | Mand | Rec    | Pos | BRAF V600E | BRAF V600E       |
| 14 | AU        | F      | 44  | Mand | Rec    | Pos | NA         | BRAF V600E       |
| 15 | AU        | F      | 18  | Mand | Prim   | Pos | WT         | BRAF V600E       |
| 16 | AU        | M      | 57  | Mand | Prim   | Pos | BRAF V600E | BRAF V600E       |
| 17 | AU        | M      | 16  | Max  | Prim   | Neg | WT         | WT               |
| 18 | AU        | M      | 66  | Mand | Rec    | Neg | NA         | NA               |
| 19 | AU        | M      | 65  | Mand | Prim   | Pos | NA         | BRAF V600E       |
| 20 | AU        | M      | 60  | Mand | Prim   | NV  | BRAF V600E | BRAF V600E       |
| 21 | AU        | F      | 38  | Mand | Prim   | Pos | NA         | BRAF V600E       |
| 22 | AU        | F      | 21  | Mand | Prim   | Pos | BRAF V600E | BRAF V600E       |
| 23 | AU        | M      | 56  | Mand | Prim   | Neg | BRAF V600E | BRAF V600E       |
| 24 | AU        | M      | 57  | Max  | Prim   | Neg | WT         | WT               |
| 25 | AC        | F      | 56  | Mand | Rec    | Neg | WT         | WT               |
| 26 | AC        | M      | 33  | Mand | Rec    | Neg | WT         | WT               |
| 27 | AC        | M      | 49  | Mand | Rec    | Neg | NA         | NA               |
| 28 | AC        | F      | 68  | Max  | Rec    | Neg | WT         | PIKC3A<br>T1025T |
| 29 | AC        | F      | 68  | Max  | Rec    | Pos | WT         | PIKC3A<br>T1025T |
| 30 | AC        | F      | 54  | Mand | Prim   | Neg | WT         | WT               |
| 31 | AC        | M      | 48  | Mand | Prim   | Neg | WT         | WT               |
| 32 | AC        | M      | 80  | Max  | Rec    | Neg | WT         | WT               |
| 33 | AC        | M      | 82  | Max  | Prim   | Neg | WT         | WT               |
| 34 | AC        | M      | 64  | Mand | Prim   | Pos | BRAF V600E | BRAF V600E       |
| 35 | AC        | F      | 50  | Mand | Prim   | Neg | WT         | WT               |
| 36 | AC        | F      | 50  | Mand | Prim   | Neg | WT         | WT               |
| 37 | AC        | M      | 45  | Mand | Rec    | Pos | NA         | NA               |

|    |         |   |    |      |      |     |            |            |
|----|---------|---|----|------|------|-----|------------|------------|
| 38 | AC      | M | 66 | Mand | Rec  | Neg | WT         | NRAS Q61R  |
| 39 | AC      | M | 44 | Mand | Prim | Pos | WT         | WT         |
| 40 | AC      | M | 73 | Mand | Prim | Neg | WT         | WT         |
| 41 | AC      | M | 50 | Mand | Prim | Neg | WT         | NRAS Q61R  |
| 42 | A E/P   | M | 59 | Mand | Prim | Pos | NV         | NV         |
| 43 | A E/P   | M | 73 | Mand | Rec  | Pos | BRAF V600E | BRAF V600E |
| 44 | A E/P   | M | 83 | Max  | Rec  | Neg | WT         | WT         |
| 45 | A E/P   | F | 60 | Mand | Rec  | Neg | BRAF V600E | BRAF V600E |
| 46 | A E/P   | M | 67 | Max  | Rec  | Neg | WT         | WT         |
| 47 | A E/P   | F | 52 | Mand | Prim | Neg | BRAF V600E | BRAF V600E |
| 48 | A E/P   | M | 54 | Max  | Prim | Neg | WT         | WT         |
| 49 | CEOT    | F | 12 | Max  | Prim | Neg | WT         | WT         |
| 50 | CEOT    | F | 52 | Max  | Rec  | Neg | WT         | WT         |
| 51 | CEOT    | M | 16 | Mand | Rec  | Neg | WT         | WT         |
| 52 | CEOT    | F | 44 | Max  | Prim | Neg | WT         | WT         |
| 53 | OKC     | M | 40 | Max  | Rec  | Neg | WT         | WT         |
| 54 | OKC     | M | 56 | Mand | Rec  | Neg | WT         | WT         |
| 55 | OKC     | M | 46 | Mand | Rec  | Neg | WT         | WT         |
| 56 | OKC     | M | 37 | Max  | Rec  | Neg | WT         | WT         |
| 57 | OKC     | M | 59 | Mand | Rec  | Neg | WT         | WT         |
| 58 | OKC     | M | 24 | Mand | Rec  | Neg | WT         | NRAS Q61L  |
| 59 | OKC     | M | 38 | Max  | Prim | Neg | WT         | WT         |
| 60 | OKC     | M | 40 | Max  | Rec  | Neg | WT         | WT         |
| 61 | OKC     | M | 54 | Mand | Prim | Neg | WT         | WT         |
| 62 | OKC     | M | 68 | Max  | Rec  | Neg | WT         | WT         |
| 63 | OKC     | M | 42 | Mand | Prim | Neg | WT         | WT         |
| 64 | OKC     | M | 33 | Max  | Prim | Neg | WT         | WT         |
| 65 | OKC     | M | 19 | Mand | Prim | Neg | WT         | NRAS Q61L  |
| 66 | OKC     | M | 54 | Mand | Prim | Neg | WT         | WT         |
| 67 | OKC     | M | 60 | Max  | Prim | Neg | WT         | WT         |
| 68 | S-OKC   | F | 17 | Mand | Prim | Neg | WT         | WT         |
| 69 | S-OKC   | F | 10 | Max  | Prim | Neg | WT         | WT         |
| 70 | S-OKC   | F | 20 | Mand | Prim | Neg | WT         | WT         |
| 71 | S-OKC   | F | 8  | Max  | Prim | Neg | WT         | WT         |
| 72 | Ca. amb | M | 59 | Max  | Prim | Neg | NV         | NV         |
| 73 | Ca. amb | M | 45 | Max  | Rec  | Neg | WT         | KRAS A146V |
| 74 | Ca. amb | M | 38 | Max  | Rec  | NV  | WT         | KRAS A146V |
| 75 | Ca. amb | M | 91 | Mand | Rec  | Neg | WT         | WT         |
| 76 | Ca. amb | M | 82 | Mand | Prim | Neg | WT         | WT         |
| 77 | Ca. CC  | F | 81 | Mand | Rec  | Neg | NV         | NV         |

|    |        |   |    |      |      |     |    |    |
|----|--------|---|----|------|------|-----|----|----|
| 78 | Ca. CC | F | 80 | Mand | Prim | Neg | NV | NV |
| 79 | Ca. CC | F | 77 | Max  | Prim | Neg | NV | NV |
| 80 | FS amb | M | 52 | Mand | Prim | Neg | NV | NV |
| 81 | FS amb | M | 40 | Max  | Prim | Neg | NV | NV |

Supplemental Table 1. Mutational status of odontogenic lesions. AMB: ameloblastoma; AU: unicystic ameloblastoma; AC: conventional ameloblastoma; A E / P: extraosseous / peripheral ameloblastoma; OKC: odontogenic keratocyst; S-OKC: syndromic odontogenic keratocyst; CEOT: calcifying epithelial odontogenic tumor; Ca. amb: ameloblastic carcinoma; FS amb: ameloblastic fibrosarcoma; Ca. CC: clear cells odontogenic carcinoma; IHC: immunohistochemistry; M: male; F: female; Max: maxilla; Mand: mandible; Prim: primitive; Rec: recurrence; Pos: positive; Neg: negative; NA: No available; NV: No evaluated.
